# Supplementary material for: Removal of paraquat from aqueous solutions by a bentonite modified zero-valent iron adsorbent
Source: Royal Society of Chemistry journal article supplement (doi:10.1039/d0nj02259d), 2020-01-01
Supplement: d0nj02259d1.pdf [file d0nj02259d1.pdf]

# **Removal of paraquat from aqueous solutions by bentonite modified zero-valent iron adsorbent**

Zahra Dehgani<sup>a</sup>, Mohammad Sedghi asl<sup>a</sup>, Mehrorang Ghaedi<sup>b\*</sup>, Mohammad Mehdi Sabzehmeidani<sup>c</sup>, , Ebrahim Adhami<sup>a</sup>

## **Supporting information**

<sup>a</sup> *Agricultural Department, Yasouj University, Yasouj 759181-74831, Iran*

<sup>b</sup> *Chemistry Department, Yasouj University, Yasouj 759181-74831, Iran*

<sup>c</sup> *Chemical Engineering Department, Yasouj University, Yasouj, Iran*

*Corresponding authors:*

*\* E-Mail: [m\\_ghaedi@yu.ac.ir](mailto:m_ghaedi@yu.ac.ir), Tel&fax: +98-74-33223048*

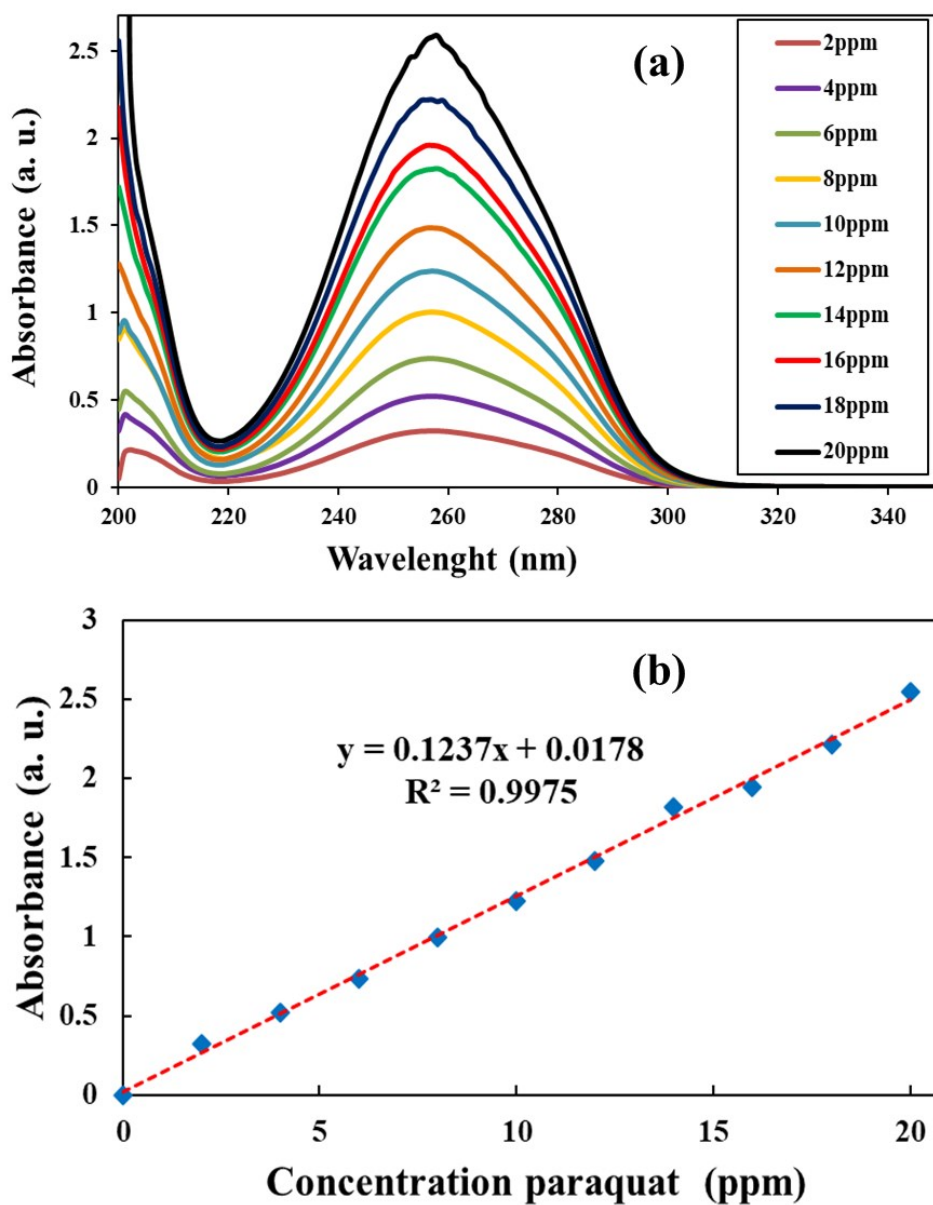

**Fig. S1.** UV-visible spectra of paraquat solution with different concentrations and (b) Calibration curves of absorbance as a function of paraquat concentration at 255 nm.

**Table S1.** Molecular structure and properties of Paraquat.

| Herbicides         | Paraquat                                                                                                                                     |
|--------------------|----------------------------------------------------------------------------------------------------------------------------------------------|
| Structural formula | 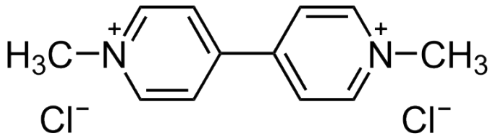<br><chem>C[N+]1=CC=CC=C1C2=CC=CC=[N+]2.[Cl-].[Cl-]</chem> |
| Molecular weight   | 257.16 g mol <sup>-1</sup>                                                                                                                   |
| Chemical formula   | C <sub>12</sub> H <sub>14</sub> N <sub>2</sub>                                                                                               |
